# Supplementary material for: Safety and Feasibility of Combining On-Demand Selective Locoregional Treatment with First-Line Atezolizumab Plus Bevacizumab for Patients with Unresectable Hepatocellular Carcinoma
Source: Curr Oncol. 2024 Mar 15;31(3):1543–55. doi: 10.3390/curroncol31030117 (PMC10969074; doi:10.3390/curroncol31030117)
Supplement: Supplementary file 1 [file curroncol-31-00117-s001.zip › 20240131_Atezo_Bev_combination_Table_S1_ì┼ÉV.xlsx]

## Sheet: Table S1
Table S1. Summary of treatment information of the combination group patients
					Best response			Combination therapy
	BCLC stage				Prior to the first combination therapy							Resumption of atezo/bev after locoregional treatment
Patient		MVI	EHM			Overall period		Times	Days*	Procedure	Purpose		Discontinuation period**
1	C	+	-		SD	CR		2	127	TACE for solitary intrahepatic tumor that remained during atezo/bev treatment	CR-oriented	no	N.A.
									627	RFA for solitary intrahepatic tumor that appeared post CR after withdrawal of atezo/bev	PD salvage	no	N.A.
2	C	-	+ (bone)		SD	SD		1	90	SBRT for sacral and rib metastases that progressed during atezo/bev treatment	PD salvage	yes	49
3	C	-	+ (bone, lung)		SD	PR		1	118	RFA for solitary intrahepatic tumor that remained during atezo/bev treatment	CR-oriented	yes	70
4	B	-	-		SD	CR		2	296	RFA for two intrahepatic tumors that remained during atezo/bev treatment	CR-oriented	yes	42
									490	RFA for solitary intrahepatic tumor that appeared after CR during atezo/bev maintenance therapy	PD salvage	yes	49
5	C	-	+ (lymph node)		PR	PR		1	270	RFA for solitary intrahepatic tumor that newly appeared during atezo/bev treatment	PD salvage	yes	50
6	C	-	+ (lung)		SD	PR		3	257	SBRT for IVC tumor thrombosis that progressed during atezo/bev treatment	PD salvage	yes	38
									286	RFA for four intrahepatic tumors that remained during atezo/bev treatment	CR-oriented	yes	28
									589	RFA for solitary lung metastatic tumor that progressed during atezo/bev treatment	PD salvage	yes	49
7	C	-	+ (lymph node)		PR	CR		1	218	Surgical resection of lymph node metastasis that shrunk during atezo/bev treatment	CR-oriented	yes	77
8	C	-	+ (lymph node)		PR	CR		1	230	Surgical resection of lymph node metastasis that shrunk during atezo/bev treatment	CR-oriented	no	N.A.
9	B	-	-		SD	SD		1	69	RFA for solitary intrahepatic tumor that progressed during atezo/bev treatment	PD salvage	yes	42
10	B	-	-		PR	CR		1	426	RFA for two intrahepatic tumors that remained during atezo/bev treatment	CR-oriented	no	N.A.
The treatment course of Patients 6 and 10 is shown in Figure S3 and S2, respectively.
*Days: days from the initiation of atezolizumab plus bevacizumab to combination therapy
**Discontinuation period: total discontinuation days before and after locoregional treatment. The case for which atezo/bev was not resumed after locoregional treatment was described as N.A.
BCLC, Barcelona Clinic Liver Cancer; MVI, macrovascular invasion; EHM, extrahepatic metastasis; atezo/bev, atezolizumab plus bevacizumab
SD, stable disease; PR, partial response; CR, complete response
TACE, transarterial chemoembolization; RFA, radiofrequency ablation; SBRT, stereotactic body radiotherapy; IVC, inferior vena cava; N.A., not applicable
