# Supplementary figures and images for: Safety and Feasibility of Combining On-Demand Selective Locoregional Treatment with First-Line Atezolizumab Plus Bevacizumab for Patients with Unresectable Hepatocellular Carcinoma
Source: MDPI journal article supplement (doi:10.3390/curroncol31030117), 2024-03-15

Figure S2

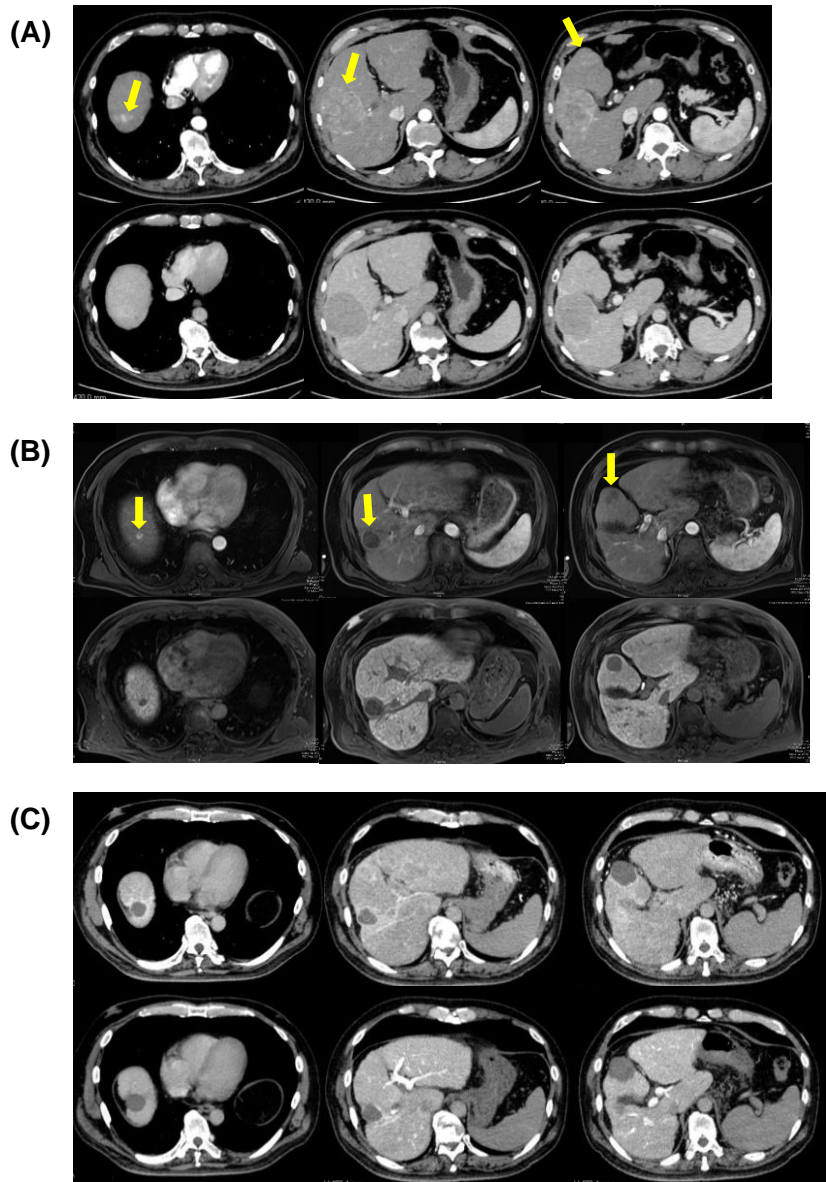

Supplement: s1 [file s1]

Figure S3

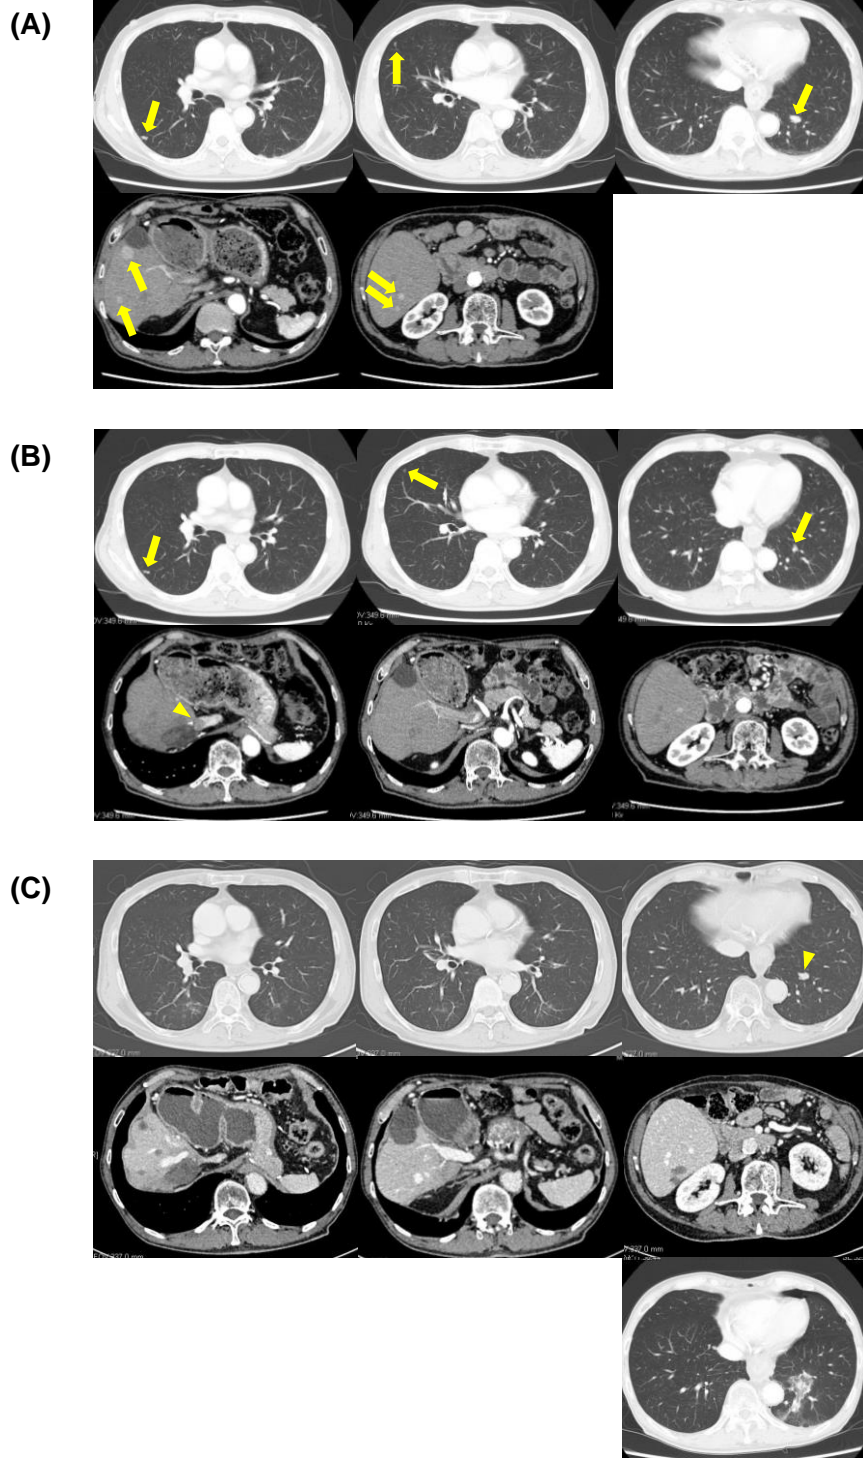

Supplement: s1 [file s1]

Figure S1

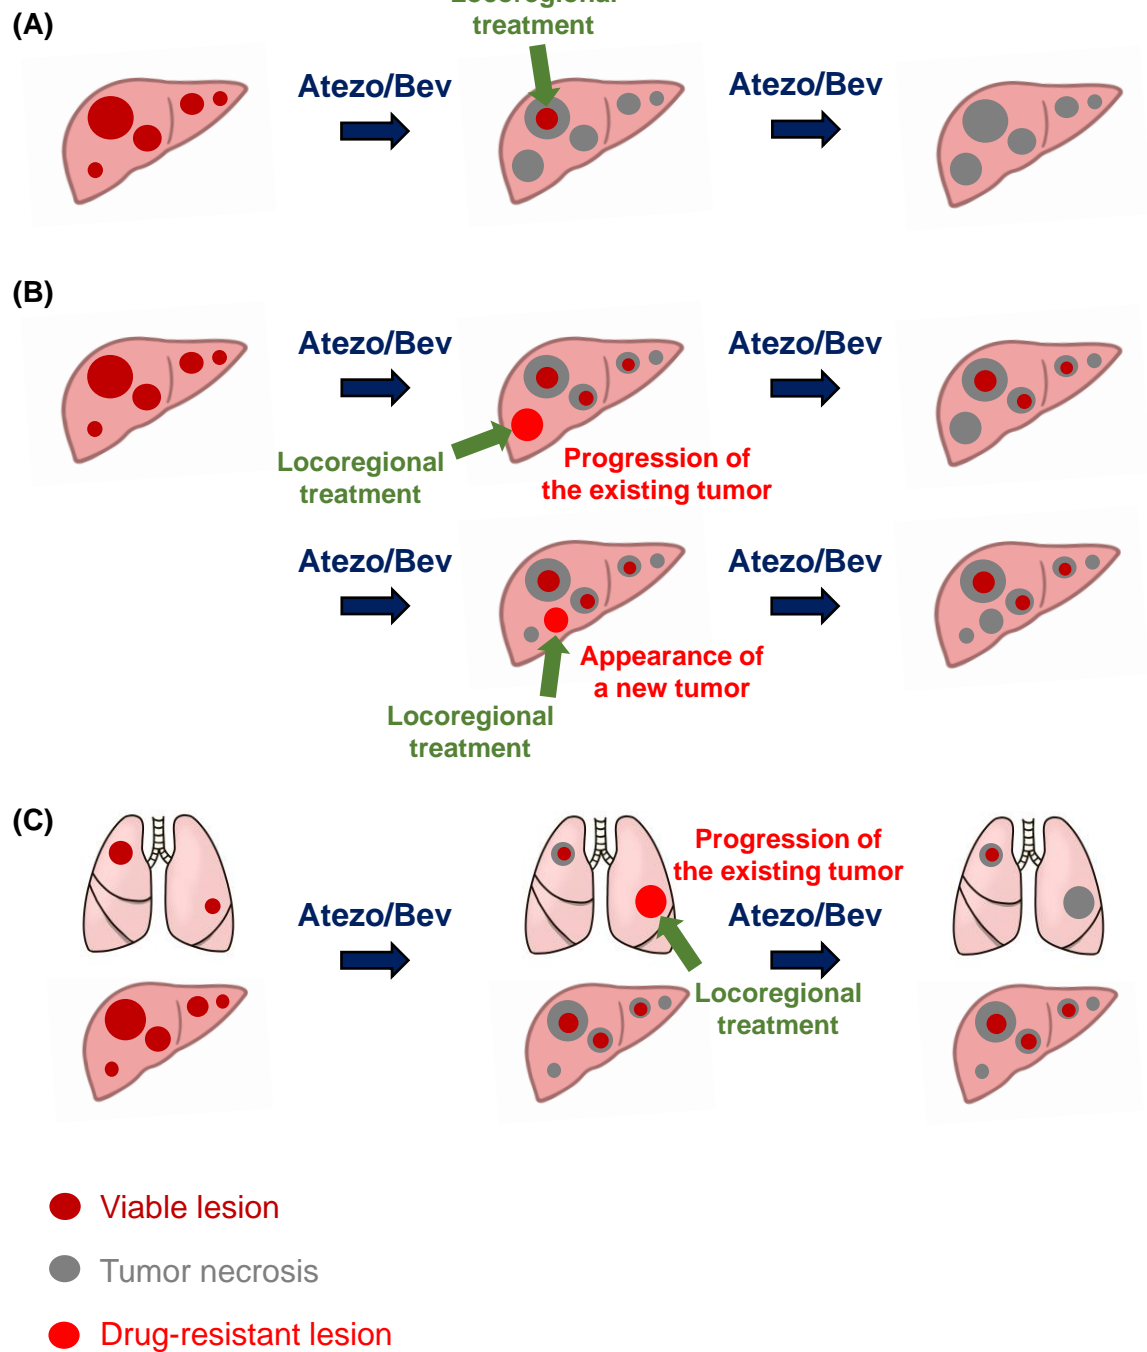

Supplement: s1 [file s1]
